# Supplementary material
Source: MDPI journal article supplement (https://www.mdpi.com/2410-3888/6/4/57)
Supplement: s1 [file s1]

Supplementary Figures and Tables

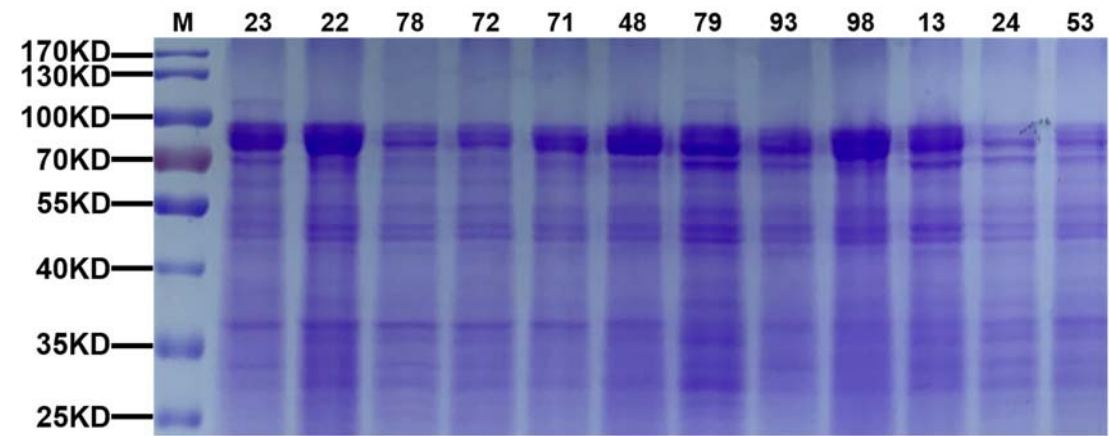

Figure S1. The quality control by SDS-PAGE.

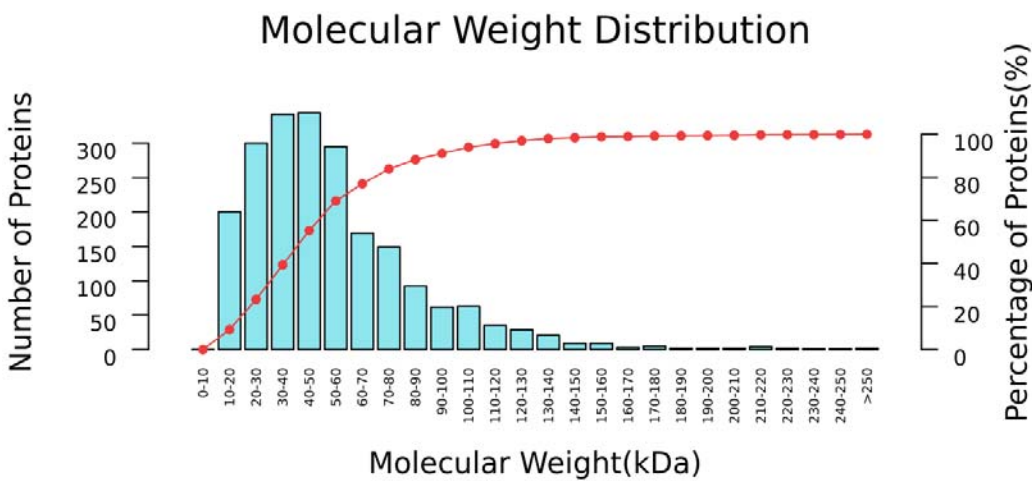

Figure S2. The molecular weight distribution for identified proteins.

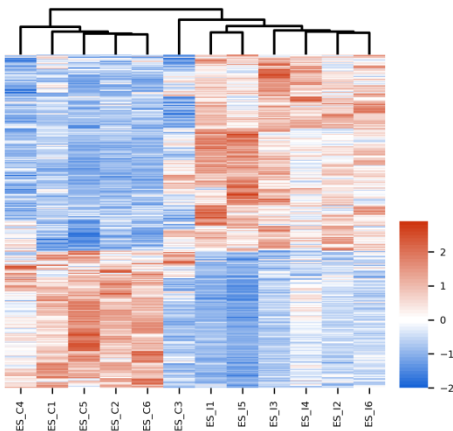

Figure S3. The heatmap image analysis between parasitized and non-parasitized crabs.

**Table S1 The concentration of proteins detected in Chinese mitten crab hepatopancreas.**

| ID                     | 30223 | 30222 | 30178 | 30172 | 30171 | 30148 | 30079 | 30093 | 30098 | 30113 | 30124 | 30153 |
|------------------------|-------|-------|-------|-------|-------|-------|-------|-------|-------|-------|-------|-------|
| hepatopancreas (μg/μl) | 17.3  | 30.1  | 23.1  | 26.9  | 25    | 18.5  | 23.1  | 23.3  | 27.4  | 22.4  | 20.1  | 23.6  |
| volume(μl)             | 400   | 400   | 400   | 400   | 400   | 400   | 400   | 400   | 400   | 400   | 400   | 400   |
| Total(μg)              | 6920  | 12040 | 9240  | 10760 | 10000 | 7400  | 9240  | 9320  | 10960 | 8960  | 8040  | 9440  |

**Table S2 Significant enrichment of GO terms (p<0.05) in Chinese mitten crab infected with *P. gregaria*.**

| GO-ID      | GO-Term                                                                | Category | P-Value | Diff |
|------------|------------------------------------------------------------------------|----------|---------|------|
| GO:0043202 | lysosomal lumen                                                        | C        | 0.00033 | 10   |
| GO:0005886 | plasma membrane                                                        | C        | 0.00034 | 81   |
| GO:0003677 | DNA binding                                                            | F        | 0.00052 | 1    |
| GO:0005790 | smooth endoplasmic reticulum                                           | C        | 0.00086 | 10   |
| GO:0035577 | azurophil granule membrane                                             | C        | 0.00091 | 8    |
| GO:0005615 | extracellular space                                                    | C        | 0.0012  | 40   |
| GO:0030246 | carbohydrate binding                                                   | F        | 0.00135 | 12   |
| GO:0005525 | GTP binding                                                            | F        | 0.00157 | 36   |
| GO:0019882 | antigen processing and presentation                                    | P        | 0.00167 | 5    |
| GO:0098993 | anchored component of synaptic vesicle membrane                        | C        | 0.00167 | 5    |
| GO:0003924 | GTPase activity                                                        | F        | 0.0024  | 31   |
| GO:0035099 | hemocyte migration                                                     | P        | 0.00247 | 6    |
| GO:0000184 | nuclear-transcribed mRNA catabolic process,<br>nonsense-mediated decay | P        | 0.00274 | 13   |
| GO:0008305 | integrin complex                                                       | C        | 0.00389 | 10   |
| GO:0048471 | perinuclear region of cytoplasm                                        | C        | 0.00414 | 50   |
| GO:0005764 | lysosome                                                               | C        | 0.00521 | 19   |
| GO:0051489 | regulation of filopodium assembly                                      | P        | 0.00602 | 4    |
| GO:0051593 | response to folic acid                                                 | P        | 0.00602 | 4    |
| GO:0045298 | tubulin complex                                                        | C        | 0.00658 | 7    |
| GO:0007476 | imaginal disc-derived wing morphogenesis                               | P        | 0.00674 | 7    |
| GO:0006012 | galactose metabolic process                                            | P        | 0.00674 | 7    |
| GO:0016282 | eukaryotic 43S preinitiation complex                                   | C        | 0.00756 | 6    |
| GO:0000045 | autophagosome assembly                                                 | P        | 0.00756 | 6    |
| GO:0030521 | androgen receptor signaling pathway                                    | P        | 0.00756 | 6    |
| GO:0034446 | substrate adhesion-dependent cell spreading                            | P        | 0.00756 | 6    |
| GO:0034663 | endoplasmic reticulum chaperone complex                                | C        | 0.00756 | 6    |
| GO:0050905 | neuromuscular process                                                  | P        | 0.00771 | 5    |
| GO:0001731 | formation of translation preinitiation complex                         | P        | 0.00771 | 5    |
| GO:0000082 | G1/S transition of mitotic cell cycle                                  | P        | 0.0108  | 11   |
| GO:0055114 | oxidation-reduction process                                            | P        | 0.01336 | 18   |
| GO:0005198 | structural molecule activity                                           | F        | 0.01366 | 1    |
| GO:0008285 | negative regulation of cell population proliferation                   | P        | 0.01366 | 1    |

|            |                                                                |   |         |    |
|------------|----------------------------------------------------------------|---|---------|----|
| GO:0032482 | Rab protein signal transduction                                | P | 0.01412 | 7  |
| GO:0005788 | endoplasmic reticulum lumen                                    | C | 0.01728 | 14 |
| GO:0031625 | ubiquitin protein ligase binding                               | F | 0.02048 | 26 |
| GO:0031430 | M band                                                         | C | 0.02078 | 9  |
| GO:0022627 | cytosolic small ribosomal subunit                              | C | 0.02078 | 9  |
| GO:0001732 | formation of cytoplasmic translation initiation complex        | P | 0.0208  | 5  |
| GO:0051721 | protein phosphatase 2A binding                                 | F | 0.0208  | 5  |
| GO:0007349 | cellularization                                                | P | 0.0208  | 5  |
| GO:0051787 | misfolded protein binding                                      | F | 0.0208  | 5  |
| GO:0010469 | regulation of signaling receptor activity                      | P | 0.02165 | 3  |
| GO:0007424 | open tracheal system development                               | P | 0.02165 | 3  |
| GO:0042623 | ATPase activity, coupled                                       | F | 0.02165 | 3  |
| GO:0035253 | ciliary rootlet                                                | C | 0.02165 | 3  |
| GO:0030317 | flagellated sperm motility                                     | P | 0.02165 | 3  |
| GO:0007494 | midgut development                                             | P | 0.02165 | 3  |
| GO:0071796 | K6-linked polyubiquitin modification-dependent protein binding | F | 0.02165 | 3  |
| GO:0010888 | negative regulation of lipid storage                           | P | 0.02165 | 3  |
| GO:0004560 | alpha-L-fucosidase activity                                    | F | 0.02165 | 3  |
| GO:0017177 | glucosidase II complex                                         | C | 0.02165 | 3  |
| GO:0006360 | transcription by RNA polymerase I                              | P | 0.02165 | 3  |
| GO:0042340 | keratan sulfate catabolic process                              | P | 0.02165 | 3  |
| GO:0016125 | sterol metabolic process                                       | P | 0.02165 | 3  |
| GO:0006650 | glycerophospholipid metabolic process                          | P | 0.02165 | 3  |
| GO:0019377 | glycolipid catabolic process                                   | P | 0.02165 | 3  |
| GO:0006004 | fucose metabolic process                                       | P | 0.02165 | 3  |
| GO:0016139 | glycoside catabolic process                                    | P | 0.02165 | 3  |
| GO:1902416 | positive regulation of mRNA binding                            | P | 0.02165 | 3  |
| GO:0071006 | U2-type catalytic step 1 spliceosome                           | C | 0.02165 | 3  |
| GO:0046809 | replication compartment                                        | C | 0.02165 | 3  |
| GO:0003688 | DNA replication origin binding                                 | F | 0.02165 | 3  |
| GO:0008094 | DNA-dependent ATPase activity                                  | F | 0.02165 | 3  |
| GO:0070181 | small ribosomal subunit rRNA binding                           | F | 0.02165 | 3  |
| GO:2000767 | positive regulation of cytoplasmic translation                 | P | 0.02165 | 3  |
| GO:0005850 | eukaryotic translation initiation factor 2 complex             | C | 0.02165 | 3  |
| GO:0008199 | ferric iron binding                                            | F | 0.02165 | 3  |
| GO:0016235 | aggresome                                                      | C | 0.02165 | 3  |
| GO:0044437 | vacuolar part                                                  | C | 0.02165 | 3  |
| GO:0097452 | GAIT complex                                                   | C | 0.02165 | 3  |
| GO:2000535 | regulation of entry of bacterium into host cell                | P | 0.02165 | 3  |
| GO:0030904 | retromer complex                                               | C | 0.02165 | 3  |
| GO:0034067 | protein localization to Golgi apparatus                        | P | 0.02165 | 3  |
| GO:0004553 | hydrolase activity, hydrolyzing O-glycosyl compounds           | F | 0.02341 | 4  |

|            |                                                          |   |         |    |
|------------|----------------------------------------------------------|---|---------|----|
| GO:0000028 | ribosomal small subunit assembly                         | P | 0.02341 | 4  |
| GO:0007628 | adult walking behavior                                   | P | 0.02341 | 4  |
| GO:0016197 | endosomal transport                                      | P | 0.02341 | 4  |
| GO:0007040 | lysosome organization                                    | P | 0.02341 | 4  |
| GO:0043614 | multi-eIF complex                                        | C | 0.02341 | 4  |
| GO:0033290 | eukaryotic 48S preinitiation complex                     | C | 0.02341 | 4  |
| GO:0003735 | structural constituent of ribosome                       | F | 0.02412 | 19 |
| GO:0005777 | peroxisome                                               | C | 0.02467 | 3  |
| GO:0006886 | intracellular protein transport                          | P | 0.02719 | 19 |
| GO:0031252 | cell leading edge                                        | C | 0.03013 | 8  |
| GO:0071346 | cellular response to interferon-gamma                    | P | 0.03013 | 8  |
| GO:0005178 | integrin binding                                         | F | 0.03013 | 8  |
| GO:0045169 | fusome                                                   | C | 0.03013 | 8  |
| GO:0043687 | post-translational protein modification                  | P | 0.03165 | 23 |
| GO:0008209 | androgen metabolic process                               | P | 0.03331 | 6  |
| GO:0042026 | protein refolding                                        | P | 0.03331 | 6  |
| GO:0005815 | microtubule organizing center                            | C | 0.03331 | 6  |
| GO:0070125 | mitochondrial translational elongation                   | P | 0.03331 | 6  |
| GO:0042769 | DNA damage response, detection of DNA damage             | P | 0.03331 | 6  |
| GO:0006119 | oxidative phosphorylation                                | P | 0.03376 | 1  |
| GO:0007030 | Golgi organization                                       | P | 0.03765 | 14 |
| GO:0070374 | positive regulation of ERK1 and ERK2 cascade             | P | 0.03993 | 8  |
| GO:0005802 | trans-Golgi network                                      | C | 0.0402  | 12 |
| GO:0098793 | presynapse                                               | C | 0.04144 | 10 |
| GO:0045121 | membrane raft                                            | C | 0.04216 | 16 |
| GO:0048646 | anatomical structure formation involved in morphogenesis | P | 0.04287 | 5  |
| GO:0070126 | mitochondrial translational termination                  | P | 0.04287 | 5  |
| GO:0016485 | protein processing                                       | P | 0.04287 | 5  |
| GO:0032781 | positive regulation of ATPase activity                   | P | 0.04287 | 5  |
| GO:0016477 | cell migration                                           | P | 0.04533 | 7  |

Diff: The number of different expression proteins corresponding the GO term.
